# Supplementary material for: A Study of Dapagliflozin in Patients With Type 2 Diabetes Receiving High Doses of Insulin Plus Insulin Sensitizers
Source: Oxford University Press journal article supplement (doi:10.2337/dc09-0517), 2009-06-15
Supplement: dc090517-sup-wilding_online_appendix_18may09.doc [file dc090517-sup-wilding_online_appendix_18may09.doc]

Online Appendix

**Vital Signs and Laboratory Outcomes**

Table 1. Baseline, on-treatment, and change from baseline in vital signs and laboratory values for patients in the treatment cohort.

|  |  | | **Placebo + Insulin** | | |  | **Dapagliflozin 10 mg + Insulin** |  | **Dapagliflozin 20 mg + Insulin** |
| --- | --- | --- | --- | --- | --- | --- | --- | --- | --- |
| **Parameter** | **No.** | | **Value** | | | **No.** | **Value** | **No.** | **Value** |
| **Baseline Values** | | | | | | | | | |
| Standing blood pressure, mm Hg, mean (SD)* |  | |  | | |  |  |  |  |
| Systolic | 23 | | 128.9 (14.0) | | | 24 | 130.7 (14.5) | 24 | 126.9 (13.9) |
| Diastolic | 23 | | 76.9 (9.3) | | | 24 | 78.9 (8.7) | 24 | 76.5 (5.2) |
| Supine blood pressure, mm Hg,mean (SD)* |  | |  | | |  |  |  |  |
| Systolic | 18 | | 128.6 (16.9) | | | 20 | 125.7 (14.6) | 18 | 127.7 (9.9) |
| Diastolic | 18 | | 78.8 (9.2) | | | 20 | 76.2 (9.5) | 18 | 76.3 (6.8) |
| Cholesterol, mg/dl, mean (SD)† |  | |  | | |  |  |  |  |
| Total | 16 | | 152.4 (42.2) | | | 18 | 167.0 (45.0) | 18 | 172.3 (41.3) |
| LDL | 13 | | 64.5 (17.6) | | | 17 | 87.9 (31.7) | 17 | 94.2 (36.6) |
| HDL | 16 | | 40.1 (11.0) | | | 18 | 40.7 (6.5) | 18 | 44.4 (13.2) |
| Fasting triglycerides, mg/dl, mean (SD)† | 16 | | 217.8 (152.6) | | | 18 | 213.6 (241.5) | 18 | 171.6 (94.6) |
| Urine output, ml/24 h, mean (SD)* | 23 | | 1869.6 (878.1) | | | 24 | 1921.0 (815.0) | 24 | 1808.8 (572.7) |
| Urinary glucose, g/24 h,mean (SD)* | 23 | | 7.1 (12.0) | | | 24 | 5.1 (5.3) | 24 | 7.3 (14.1) |
| GFR, ml/min/1.73m2,mean (SD)† | 22 | | 86.2 (21.5) | | | 23 | 87.2 (33.0) | 23 | 89.2 (16.0) |
| **End of Double-blind (Week 12) Values** | | | | | | | | | |
| Standing blood pressure, mm Hg,mean (SD)* | |  | |  |  | |  |  |  |
| Systolic | | 14 | | 134.6 (14.1) | 22 | | 124.7 (16.2) | 22 | 119.1 (8.1) |
| Diastolic | | 14 | | 77.4 (11.2) | 22 | | 78.4 (10.4) | 22 | 72.6 (7.4) |
| Supine blood pressure, mm Hg, mean (SD)* | |  | |  |  | |  |  |  |
| Systolic | | 10 | | 133.3 (13.7) | 18 | | 126.2 (14.7) | 17 | 122.0 (11.6) |
| Diastolic | | 10 | | 73.6 (5.1) | 18 | | 78.2 (7.4) | 17 | 70.7 (8.2) |
| Cholesterol, mg/dl, mean (SD)†,‡ | |  | |  |  | |  |  |  |
| Total | | 16 | | 147.0 (32.3) | 18 | | 163.1 (45.3) | 18 | 187.9 (49.6) |
| LDL | | 13 | | 69.7 (24.7) | 17 | | 83.6 (32.1) | 17 | 110.8 (51.2) |
| HDL | | 16 | | 40.0 (9.2) | 18 | | 40.1 (6.0) | 18 | 45.2 (13.5) |
| Fasting triglycerides, mg/dl, mean (SD)†,‡ | | 16 | | 180.0 (113.4) | 18 | | 206.2 (202.9) | 18 | 172.4 (61.0) |
| Urine output, mL/24 h, mean (SD)* | | 14 | | 2124.6 (511.8) | 19 | | 2285.8 (894.1) | 21 | 2253.1 (831.2) |
| Urinary glucose, g/24 h, mean (SD)* | | 13 | | 4.3 (5.7) | 19 | | 89.0 (50.7) | 20 | 92.9 (44.7) |
| GFR, ml/min/1.73m2,mean (SD)†,‡ | | 22 | | 85.6 (21.5) | 23 | | 86.3 (39.6) | 23 | 90.6 (26.1) |
| **Change From Baseline** | | | | | | | | | |
| | Standing blood pressure, mean (SE), mm Hg* |  |  |  |  |  |  | | --- | --- | --- | --- | --- | --- | --- | | Systolic | 14 | 2.8 (3.9) | 22 | –7.2 (2.5) | 22 | –6.1 (2.5) | | Diastolic | 14 | 0.3 (2.9) | 22 | –1.2 (1.9) | 22 | –3.9 (1.6) | | Supine blood pressure, mean (SE), mm Hg* |  |  |  |  |  |  | | Systolic | 10 | 2.1 (6.2) | 18 | –0.7 (2.6) | 17 | –5.5 (1.7) | | Diastolic | 10 | –4.1 (2.7) | 18 | 1.3 (2.3) | 17 | –5.8 (1.8) | | Cholesterol, % change, mean (95% CI)†,‡,§ |  |  |  |  |  |  | | Total | 16 | –4.42 (–11.7 to 3.5) | 18 | –2.03 (–9.0 to 5.5) | 18 | 10.00 (2.11 to 18.5) | | LDL | 13 | 2.97 (–11.5 to 19.8) | 17 | –4.18 (–15.5 to 8.7) | 17 | 15.38 (1.5 to 31.1) | | HDL | 16 | –0.26 (–5.4 to 5.2) | 18 | –1.60 (–6.4 to 3.4) | 18 | 2.61 (–2.4 to 7.9) | | Triglycerides, % change,mean (95% CI)†,‡,§ | 16 | –12.63 (–25.5 to 2.5) | 18 | –2.33 (–15.9 to 13.5) | 18 | 3.08 (–11.3 to 19.8) | | Urinary glucose, g/24 h, mean (SE)* | 13 | –1.5 (1.3) | 19 | 83.5 (11.4) | 20 | 85.2 (9.9) | | GFR, ml/min/1.73m2,mean (95%CI)†,‡ | 22 | -0.58 (-6.1 to 4.9) | 23 | -0.84 (-6.6, 4.9) | 23 | 1.45 (-6.8, 9.7) | | | | | | | | | | |

SD, standard deviation; SE, standard error; LDL, low-density lipoprotein; HDL, high-density lipoprotein ; GFR, glomerular filtration rate.

*Number of all treated patients with nonmissing baseline and time-point values.

†Number of patients with nonmissing baseline and week 12 (LOCF) values.

‡Excludes data after insulin up-titration.

§Adjusted percent change from baseline based on an ANCOVA model with treatment group as an effect and log (baseline value) as a covariate.

**Investigators:**

**United States:**

Arkansas: NEA Clinic, Jonesboro (K.D. Ganong, MD)

California: Valley Research, Fresno (P. Norwood, MD); Richard Bernstein Offices, Greenbrae (R.I. Bernstein, MD)

Colorado: Longmont Medical Research Network, Longmont (D. Podlecki, MD)

Indiana: Indiana University, Indianapolis (K. Mather, MD); Research Solutions, Evansville (J. Wahle, MD)

Georgia: Endocrine Research Solutions, Roswell (J.C.H. Reed III, MD); Atlanta Diabetes Associates, Atlanta (Cohort 1 participation only) (B. Bodie, MD)

Florida: Jacksonville Center for Clinical Research, Jacksonville (E.L. Schramm, MD)

Ohio: Your Diabetes Endocrine Nutrition Group, Mentor (D. Weiss, MD)

Maryland: Model Clinical Research, Baltimore (J.H. Mersey, MD)

Michigan: University of Michigan, Ann Arbor (E. Oral MD)

Mississippi: Endocrine Research Assoc., Jackson (R. Evans, MD)

Missouri: St. Louis Center for Clinical Research, St. Louis (R. Suwannasri, MD)

New York: SUNY Upstate Medical University, Syracuse (R.S. Weinstock, MD)

North Carolina: Mountain Diabetes and Endocrine Center, Asheville (W. Lane, MD)

Texas: Diabetes and Glandular Disease Research Associates, San Antonio (M. Kipnes, MD); Research Institute of Dallas, Dallas (S.L. Aronoff, MD)

Washington: Rainier Clinical Research Center, Renton (A. Sussman, MD)

Wisconsin: Aurora Advanced Healthcare, Milwaukee (R.K. Jain, MD)

**Canada:**

New Brunswick: Maritime Research Center, Bathurst (F. Khan, MD)

Manitoba: Health Sciences Centre Diabetes Research Group, Winnipeg (V. Woo, MD)

Québec: Clinique d'Endocrinologie de l'Outaouais, Gatineau (J. Garon, MD) ; Viacar Recherche Clinique, Longueuil (J-P. Beauchef, MD) ; Centre de Recherche d’Endocrinologie Godin & St-Pierre, Sherbrooke (C. Godin, MD) ; Centre de Recherche Clinique de Laval, Laval (A. Belanger, MD) ; Ultramed, Pointe-Claire (A. Skamene, MD)
